# Supplementary material for: Burden of Cardiovascular Diseases in Nepal from 1990 to 2019: The Global Burden of Disease Study, 2019
Source: Hindawi journal article supplement (doi:10.1155/2023/3700094), 2023-06-19
Supplement: f1 [file 3700094.f1.zip]

Supplementary material 2: DALYs per 100,000 and % of DALYs attributable to CVDs

| Age group | Both sex                        |                                 | Male                            |                              | Female                          |                              |
|-----------|---------------------------------|---------------------------------|---------------------------------|------------------------------|---------------------------------|------------------------------|
|           | DALYs per 100,000<br>(95% UI)   | % of total<br>DALYs<br>(95% UI) | DALYs per 100,000<br>(95% UI)   | % of total DALYs<br>(95% UI) | DALYs per 100,000<br>(95% UI)   | % of total DALYs<br>(95% ui) |
| <1 year   | 275.96 (161.36-453.73)          | 0.12 (0.07-0.18)                | 369.28 (195.87-656.83)          | 0.15 (0.09-0.24)             | 177.2 (84.33-333.71)            | 0.08 (0.04-0.14)             |
| 1 to 4    | 43.36 (26.84-70.25)             | 0.36 (0.23-0.57)                | 53.49 (30.03-92.11)             | 0.45 (0.26-0.77)             | 32.66 (18.83-53.48)             | 0.27 (0.15-0.45)             |
| 5 to 9    | 55.05 (39.87-72.78)             | 0.68 (0.51-0.91)                | 57.09 (40.05-80.6)              | 0.67 (0.46-0.97)             | 52.91 (37.5-73.05)              | 0.7 (0.49-0.97)              |
| 10 to 14  | 97.2 (69.2-134.7)               | 1.18 (0.86-1.61)                | 105.63 (66.57-160.73)           | 1.27 (0.8-1.91)              | 88.49 (60.72-127.27)            | 1.09 (0.75-1.55)             |
| 15 to 19  | 376.08 (263.09-525.02)          | 3.04 (2.14-4.23)                | 514.19 (328.37-785.1)           | 3.87 (2.47-5.83)             | 241.69 (157-354.84)             | 2.11 (1.37-3.06)             |
| 20 to 24  | 576.77 (393.43-808.74)          | 3.85 (2.73-5.37)                | 842.24 (510.35-1,298.73)        | 5.11 (3.28-7.76)             | 344.56 (228.39-478.56)          | 2.52 (1.72-3.48)             |
| 25 to 29  | 669.37 (438.05-917.74)          | 4.07 (2.71-5.58)                | 894.2 (527.82-1,386.42)         | 5.28 (3.24-8.01)             | 491.18 (316.65-695.43)          | 3.06 (1.93-4.44)             |
| 30 to 34  | 1,011.84 (581.83-1,436.93)      | 5.41 (3.23-7.55)                | 1,311.95 (606.64-2,052.88)      | 6.99 (3.35-10.66)            | 787.08 (477.41-1,171.88)        | 4.22 (2.51-6.26)             |
| 35 to 39  | 1,571.72 (918.7-2,175.14)       | 7.04 (4.08-9.53)                | 1,993.77 (757.72-2,987.17)      | 8.93 (3.42-12.95)            | 1,254.47 (801.44-1,842.72)      | 5.62,] (3.67-8.06)           |
| 40 to 44  | 2,907.91 (2,001.55-4,023.85)    | 10.53 (7.63-13.56)              | 3,611.93 (2,173.53-5,195.19)    | 12.91 (7.94-17.66)           | 2,346.95 (1,592.39-3,318.3)     | 8.59 (5.9-11.81)             |
| 45 to 49  | 4,743.42 (3,355.77-6,323.86)    | 13.67 (10.14-17.3)              | 5,906.41 (3,862.62-8,297.86)    | 16.42 (11.35-21.77)          | 3,739.46 (2,529.78-5,188.53)    | 11.12 (7.74-15.09)           |
| 50 to 54  | 7,652.55 (5,662.88-10,018.48)   | 17.16 (13.74-20.92)             | 10,216.2 (7,315-13,710.69)      | 21.24 (16.08-26.86)          | 5,277.23 (3,546.56-7,399.79)    | 12.76 (9.1-17.14)            |
| 55 to 59  | 11,385.43 (8,476.75-14,546.35)  | 20.1 (16.63-23.99)              | 15,224.83 (11,008.18-19,772.71) | 24.05 (19.12-29.05)          | 7,751.51 (5,390.06-10,661.08)   | 15.4 (11.15-20.26)           |
| 60 to 64  | 16,056.17 (11,923.95-20,327.17) | 22.08 (18.34-26.41)             | 21,664.89 (15,552.59-27,841.68) | 26.04 (20.8-32.06)           | 1,0876.45 (7,838.2-14,594.78)   | 17.26 (12.94-22.19)          |
| 65 to 69  | 21,465.24 (16,207.62-26,447.91) | 23.56 (19.77-27.74)             | 28,784.2 (20,977.12-36,632.05)  | 27.56 (22.58-33.07)          | 14,985.48 (10,764.29-19,735.58) | 18.91 (14.15-24.03)          |
| 70 to 74  | 27,850.98 (21,582.28-34,215.52) | 24.22 (20.02-28.53)             | 35,370.74 (26,045.98-45,069.45) | 27.61 (22.25-33.72)          | 20,717.19 (14,722.75-26,981.12) | 20.2 (14.6-25.81)            |
| 75 to 79  | 35,201.2 (28,050.55-42,650.45)  | 25.22 (21.25-29.67)             | 42,124.51 (32,168.24-52,725.22) | 27.89 (22.59-33.81)          | 28,642.25 (20,596.63-36,853.53) | 22.25 (16.37-28.16)          |
| 80 plus   | 41,799.57 (34,555.06-48,789.83) | 23.41 (20.09-26.73)             | 51,227.05 (41,536.8-61,148.16)  | 27.29 (23.13-32.17)          | 33,649 (25,686.3-42,811.24)     | 19.72 (15.19-24.85)          |
