# Supplementary material for: Burden of Cardiovascular Diseases in Nepal from 1990 to 2019: The Global Burden of Disease Study, 2019
Source: Hindawi journal article supplement (doi:10.1155/2023/3700094), 2023-06-19
Supplement: f1 [file 3700094.f1.zip]

Supplementary material 1: Mortality rate (per 100,000 population) and % of deaths attributable to CVDs

| Age      | Both sex                  |                            | Male                      |                            | Female                    |                            |
|----------|---------------------------|----------------------------|---------------------------|----------------------------|---------------------------|----------------------------|
|          | Mortality rate (95% UI)   | % of total deaths (95% UI) | Mortality rate (95% UI)   | % of total deaths (95% UI) | Mortality rate (95% UI)   | % of total deaths (95% UI) |
| <1 year  | 3.08 (1.79-5.08)          | 0.12 (0.07-0.18)           | 4.13 (2.17-7.39)          | 0.15 (0.09-0.25)           | 1.97 (0.92-3.74)          | 0.08 (0.04-0.14)           |
| 1 to 4   | 0.41 (0.22-0.72)          | 0.43 (0.24-0.77)           | 0.53 (0.26-0.97)          | 0.56 (0.29-1.01)           | 0.28 (0.13-0.53)          | 0.3 (0.14-0.55)            |
| 5 to 9   | 0.42 (0.26-0.63)          | 0.91 (0.58-1.31)           | 0.45 (0.26-0.74)          | 0.88 (0.5-1.42)            | 0.38 (0.22-0.61)          | 0.94 (0.56-1.42)           |
| 10 to 14 | 0.8 (0.5-1.24)            | 2.02 (1.28-3.03)           | 0.95 (0.48-1.61)          | 2.06 (1.09-3.54)           | 0.65 (0.35-1.09)          | 1.96 (1.08-3.19)           |
| 15 to 19 | 4.46 (2.92-6.54)          | 5.53 (3.79-7.86)           | 6.48 (3.85-10.23)         | 6.15 (3.87-9.65)           | 2.5 (1.34-3.99)           | 4.41 (2.61-6.88)           |
| 20 to 24 | 7.55 (4.81-10.98)         | 7.15 (5.05-10.12)          | 11.68 (6.63-18.52)        | 8.06 (5.05-12.48)          | 3.94 (2.28-5.87)          | 5.53 (3.41-8.14)           |
| 25 to 29 | 9.35 (5.69-13.46)         | 8.3 (5.57-11.5)            | 13.2 (7.39-21.11)         | 9.19 (5.42-14.21)          | 6.3 (3.42-9.57)           | 7.14 (4.17-10.51)          |
| 30 to 34 | 15.94 (8.55-23.62)        | 11.47 (6.58-15.31)         | 21.51 (9.07-34.48)        | 12.8 (5.72-19.46)          | 11.77 (6.17-18.52)        | 10.03 (5.68-14.46)         |
| 35 to 39 | 27.94 (15.31-39.5)        | 14.28 (8.22-18.6)          | 36.36 (12.4-55.97)        | 15.98 (5.77-23.02)         | 21.61 (12.96-33.22)       | 12.58 (7.8-17.88)          |
| 40 to 44 | 58.32 (38.87-82.23)       | 19.66 (14.05-24.41)        | 73.67 (43.26-107.66)      | 21.6 (13.01-28.56)         | 46.08 (29.69-66.67)       | 17.65 (12.27-23.43)        |
| 45 to 49 | 107.91 (75.08-145.5)      | 23.31 (17.99-28.39)        | 135.82 (86.26-192.85)     | 25.54 (18.24-33.01)        | 83.81 (55.1-118.12)       | 20.77 (15.03-27.28)        |
| 50 to 54 | 197.83 (142.74-261.17)    | 26.64 (22.26-31.34)        | 266.79 (188.49-361.34)    | 30.46 (23.79-38.19)        | 133.94 (87.2-190.45)      | 21.64 (15.5-28.12)         |
| 55 to 59 | 337.22 (246.71-435.76)    | 29.06 (24.67-33.66)        | 455.04 (327.45-597.44)    | 32.39 (25.91-38.54)        | 225.7 (153.69-316.25)     | 24.3 (17.67-31.28)         |
| 60 to 64 | 553.58 (405.1-706.51)     | 29.83 (25.22-35.17)        | 753.42 (533.17-973.27)    | 33.06 (26.25-40.29)        | 369.03 (258.02-500.54)    | 25.19 (18.95-31.89)        |
| 65 to 69 | 879.73 (656.13-1098.98)   | 30.44 (26.03-35.39)        | 1188.42 (854.39-1516.94)  | 33.81 (27.82-40.08)        | 606.43 (423.09-808.8)     | 25.95 (19.18-32.87)        |
| 70 to 74 | 1393.55 (1067.93-1724.36) | 30.04 (25.02-35.31)        | 1778.76 (1283.64-2290.41) | 33.06 (26.5-40.34)         | 1028.11 (710.9-1354.5)    | 26.12 (18.69-33.87)        |
| 75 to 79 | 2227.02 (1756.21-2709.09) | 30.41 (25.57-35.78)        | 2671.6 (2013-3363.06)     | 32.81 (26.39-39.92)        | 1805.85 (1274.3-2350.23)  | 27.59 (19.94-35.17)        |
| 80 plus  | 4081.43 (3343.6-4794.57)  | 27.49 (23.73-31.36)        | 4958.56 (4013.36-5924.39) | 31.56 (27.05-37.21)        | 3323.11 (2508.31-4258.97) | 23.56 (18.23-29.3)         |
